# Supplementary material for: Sorafenib in Advanced Hepatocellular Carcinoma
Source: Atypon-hosted journal article supplement (doi:10.1056/nejmoa0708857), 2008-07-23
Supplement: nejm_llovet_378sa1.pdf [file nejm_llovet_378sa1.pdf]

## Supplementary Appendix

This appendix has been provided by the authors to give readers additional information about their work.

Supplement to: Llovet JM, Ricci S, Mazzaferro V, et al. Sorafenib in advanced hepatocellular carcinoma. *N Engl J Med* 2008;359:378-90.

**SUPPLEMENTARY APPENDIX A: DEFINITIONS AND DESCRIPTIONS OF INSTRUMENTS**

**Table A1. Definitions of ECOG Performance Status<sup>15</sup>** Reproduced with permission from Lippincott Williams and Wilkins, on behalf of Wolters Kluwer Healthcare and the American Journal of Clinical Oncology

| Grade |                                                                                                                                                           |
|-------|-----------------------------------------------------------------------------------------------------------------------------------------------------------|
| 0     | Fully active, able to carry on all pre-disease performance without restriction                                                                            |
| 1     | Restricted in physically strenuous activity but ambulatory and able to carry out work of a light or sedentary nature, e.g., light house work, office work |
| 2     | Ambulatory and capable of all selfcare but unable to carry out any work activities; up and about more than 50% of waking hours                            |
| 3     | Capable of only limited selfcare, confined to bed or chair for more than 50% of waking hours                                                              |
| 4     | Completely disabled. Cannot carry on any selfcare. Totally confined to bed or chair                                                                       |
| 5     | Dead                                                                                                                                                      |

**Table A2. Child–Pugh Classification.**<sup>16,17</sup> Copyright 1973, copyright British Journal of

Surgery Society Ltd. Reproduced with permission. Permission is granted by John Wiley &

Sons Ltd on behalf of the BJSS Ltd.

| Measure                                      | Score*  |          |          |
|----------------------------------------------|---------|----------|----------|
|                                              | 1 point | 2 points | 3 points |
| Ascites                                      | Absent  | Slight   | Moderate |
| Serum bilirubin (mg/dL)                      | <2.0    | 2.0–3.0  | >3.0     |
| Serum albumin (g/dL)                         | >3.5    | 2.8–3.5  | <2.8     |
| Prothrombin time, sec (seconds<br>prolonged) | <4      | 4–6      | >6       |
| Encephalopathy grade <sup>†</sup>            | None    | 1–2      | 3–4      |

\* Child–Pugh A: 5 or 6 points; Child–Pugh B: 7–9 points; Child–Pugh C: >9 points

<sup>†</sup> Encephalopathy grades were defined as follows; grade 0: normal consciousness,

personality, neurological examination, electroencephalogram; grade 1: restless, sleep disturbed,

irritable/agitated, tremor, impaired handwriting, 5 cps (cycles per second) waves; grade 2:

lethargic, time-disoriented, inappropriate, asterixis, ataxia, slow triphasic waves; grade 3:

somnolent, stuporous, place-disoriented, hyperactive reflexes, rigidity, slower waves; grade 4:

unrousable coma, no personality/behavior, decerebrate, slow 2–3 cps (cycles per second) delta activity

**Table A3. Definitions of Best Response According to RECIST.<sup>18</sup>** Copyright 2007, reproduced with permission from Oxford University Press and the Journal of the National Cancer Institute

| <b>Best response</b> | <b>Change in sum of longest diameter</b>                                                                   |
|----------------------|------------------------------------------------------------------------------------------------------------|
| Complete response    | Disappearance; confirmed at 4 weeks                                                                        |
| Partial response     | 30% decrease; confirmed at 4 weeks                                                                         |
| Stable disease       | Neither partial response nor progressive disease criteria met                                              |
| Progressive disease  | 20% increase; no complete response, partial response or stable disease documented before increased disease |

**Table A4. FACT Hepatobiliary Symptom Index (FHSI-8).**<sup>19</sup> Copyright 2007, reproduced

with permission from Elsevier

**Below is a list of statements that other people with your illness have said are important. By circling one number per line, please indicate how true each statement has been for you during the past 7 days**

|      |                                                             | Not<br>at all | A little bit | Somewhat | Quite a<br>bit | Very<br>much |
|------|-------------------------------------------------------------|---------------|--------------|----------|----------------|--------------|
| GP1  | I have a lack of energy                                     | 0             | 1            | 2        | 3              | 4            |
| GP2  | I have nausea                                               | 0             | 1            | 2        | 3              | 4            |
| GP4  | I have pain                                                 | 0             | 1            | 2        | 3              | 4            |
| C2   | I am losing weight                                          | 0             | 1            | 2        | 3              | 4            |
| CNS7 | I have pain in my back                                      | 0             | 1            | 2        | 3              | 4            |
| HI7  | I am fatigued                                               | 0             | 1            | 2        | 3              | 4            |
| Hep2 | I am bothered by jaundice or<br><br>yellow color to my skin | 0             | 1            | 2        | 3              | 4            |
| Hep8 | I have discomfort or pain in my<br><br>stomach              | 0             | 1            | 2        | 3              | 4            |

\* Note that higher scores represent deterioration

**Table A5. BCLC Staging System.**<sup>4</sup> Copyright 2007, reproduced with permission from

Elsevier

| BCLC stage                     |                                 |                            |                        |                            |                    |
|--------------------------------|---------------------------------|----------------------------|------------------------|----------------------------|--------------------|
|                                | Very early stage (0)            | Early stage (A)            | Intermediate stage (B) | Advanced stage (C)         | Terminal stage (D) |
| Child-Pugh                     | A                               | A-B                        | A-B                    | A-B                        | C                  |
| classification                 |                                 |                            |                        |                            |                    |
| Performance status             | 0                               | 0                          | 0                      | 1-2                        | >2                 |
| Hepatocellular carcinoma (HCC) | 1 HCC <2cm<br>Carcinoma in situ | 1 HCC or 3 nodules<br><3cm | Multinodular           | Portal invasion, N1,<br>M1 | Terminal stage     |

## APPENDIX B: DOSE REDUCTION GUIDELINES

Doses will be delayed or reduced for clinically significant hematologic and other toxicities that are related to protocol therapy. If a patient experiences several toxicities and there are conflicting recommendations, the recommended dose adjustment that reduces the dose to the lowest level will be used. All dose modifications will follow predefined dose levels:

Dose level 1: 400 mg (2x200 mg) administered orally (po) twice daily (bid)

Dose level 2: 400 mg (2x200 mg) po every day

Dose level 3: 400 mg (2x200 mg) po every two days

If further dose reduction is required, the patient should be discontinued from the study. Also, at the discretion of the investigator, the dose may be re-escalated to 400 mg po bid after the resolution of the adverse event.

| <b>Table B1. Sorafenib dose delay and modification guidelines for non-dermatological toxicities</b> |                                   |                                      |
|-----------------------------------------------------------------------------------------------------|-----------------------------------|--------------------------------------|
| Grade                                                                                               | Dose delay                        | Dose modification                    |
| <i>Hematologic toxicities</i>                                                                       |                                   |                                      |
| Grade 0-2                                                                                           | Treat on time                     | No change                            |
| Grade 3                                                                                             | Treat on time                     | Decrease one dose level              |
| Grade 4                                                                                             | Delay <sup>†</sup> until ≤grade 2 | Decrease one dose level              |
| <i>Non-hematologic toxicities (except skin toxicity)<sup>†</sup></i>                                |                                   |                                      |
| Grade 0-2                                                                                           | Treat on time                     | No change                            |
| Grade 3                                                                                             | Delay <sup>†</sup> until ≤grade 2 | Decrease one dose level <sup>‡</sup> |
| Grade 4                                                                                             | Off protocol therapy              | Off protocol therapy                 |

\* If no recovery after 30-day delay, treatment will be discontinued unless patient is deriving clinical benefit

<sup>†</sup> Also excludes nausea/vomiting that has not been premedicated, and diarrhea

<sup>‡</sup> If more than two dose reductions are required, treatment will be discontinued

| <b>Table B2. Sorafenib dose delay and modification guidelines for dermatological toxicities<sup>*</sup></b> |                |                                       |                     |
|-------------------------------------------------------------------------------------------------------------|----------------|---------------------------------------|---------------------|
| Grade                                                                                                       |                | During a course of therapy            | Dose for next cycle |
| Grade 1                                                                                                     |                | Maintain dose level                   | Maintain dose level |
| Grade 2                                                                                                     | 1st appearance | Interrupt until resolved to grade 0–1 | Maintain dose level |
|                                                                                                             | 2nd appearance | Interrupt until resolved to grade 0–1 | 400 mg every day    |

|         |                |                                       |                               |
|---------|----------------|---------------------------------------|-------------------------------|
|         | 3rd appearance | Interrupt until resolved to grade 0–1 | 400 mg every 2 days           |
|         | 4th appearance | Discontinue treatment permanently     |                               |
| Grade 3 | 1st appearance | Interrupt until resolved to grade 0–1 | 400 mg every day <sup>†</sup> |
|         | 2nd appearance | Interrupt until resolved to grade 0–1 | 400 mg every two days         |
|         | 3rd appearance | Discontinue treatment permanently     |                               |

\* Patients experiencing hand–foot skin reaction should have their signs and symptoms graded

according to the following system: grade 1: numbness, dysesthesia/paresthesia, tingling, painless

swelling or erythema of the hands and/or feet and/or discomfort, which does not disrupt normal

activities; grade 2: painful erythema and swelling of the hands and/or feet and/or discomfort affecting

the patient’s activities; grade 3: moist desquamation, ulceration, blistering or severe pain of the hands

and/or feet and/or severe discomfort that causes the patient to be unable to work or perform activities

of daily living. Other skin toxicities will be graded according to CTCAE v3.0 Common Terminology

Criteria for Adverse Events version 3.0.

<sup>†</sup> For patients who require a dose reduction for grade 3 rash or hand–foot skin reaction, the dose of study drug may be increased to the starting dose after one full cycle of therapy has been administered at the reduced dose without the appearance of rash or hand–foot skin reaction grade  $\geq 1$ .

## APPENDIX C: DESCRIPTION OF TREATMENT-EMERGENT ADVERSE EVENTS

**Table C1. Incidence of Treatment-emergent Adverse Events.**

| Adverse event*                 | Sorafenib (N = 297)    |    |    | Placebo (N = 302) |    |    | P-value for between- |        |
|--------------------------------|------------------------|----|----|-------------------|----|----|----------------------|--------|
|                                | Incidence (%) at grade |    |    |                   |    |    | group comparison     |        |
|                                | Any                    | 3  | 4  | Any               | 3  | 4  | Any                  | 3–4    |
| <b>Overall incidence</b>       | 98                     | 39 | 6  | 96                | 24 | 8  | 0.47                 | 0.04   |
| <b>Constitutional symptoms</b> |                        |    |    |                   |    |    |                      |        |
| Fatigue                        | 46                     | 9  | 1  | 45                | 12 | 2  | 1.00                 | 0.11   |
| Fever                          | 10                     | <1 | 0  | 10                | 0  | 0  | 1.00                 | 0.50   |
| Weight loss                    | 30                     | 2  | 0  | 10                | 1  | 0  | <0.001               | 0.54   |
| <b>Dermatology/skin</b>        |                        |    |    |                   |    |    |                      |        |
| Alopecia                       | 14                     | 0  | 0  | 2                 | 0  | 0  | <0.001               | –      |
| Dry skin                       | 10                     | 0  | 0  | 6                 | 0  | 0  | 0.05                 | –      |
| Hand–foot skin reaction        | 21                     | 8  | 0  | 3                 | 1  | 0  | <0.001               | <0.001 |
| Pruritus                       | 14                     | <1 | 0  | 11                | <1 | 0  | 0.46                 | 1.00   |
| Rash/desquamation              | 19                     | 1  | 0  | 14                | 0  | 0  | 0.15                 | 0.06   |
| <b>Gastrointestinal</b>        |                        |    |    |                   |    |    |                      |        |
| Anorexia                       | 29                     | 3  | 0  | 18                | 3  | <1 | 0.001                | 1.00   |
| Ascites                        | 22                     | 6  | <1 | 24                | 10 | 1  | 0.56                 | 0.10   |
| Constipation                   | 14                     | 0  | 0  | 10                | 0  | 0  | 0.17                 | –      |
| Diarrhea                       | 55                     | 10 | <1 | 25                | 2  | 0  | <0.001               | <0.001 |
| Nausea                         | 24                     | 1  | 0  | 20                | 3  | 0  | 0.24                 | 0.26   |
| Vomiting                       | 15                     | 2  | 0  | 11                | 2  | 0  | 0.18                 | 0.57   |
| <b>Hepatobiliary</b>           |                        |    |    |                   |    |    |                      |        |
| Liver dysfunction              | 11                     | 2  | 1  | 8                 | 2  | 1  | 0.13                 | 0.82   |
| <b>Lymphatics</b>              |                        |    |    |                   |    |    |                      |        |
| Edema, limb                    | 16                     | 3  | 0  | 18                | 0  | 0  | 0.51                 | 0.004  |

| Pain              |    |   |   |    |   |    |      |      |
|-------------------|----|---|---|----|---|----|------|------|
| Pain, abdomen NOS | 31 | 9 | 0 | 26 | 5 | 1  | 0.15 | 0.21 |
| Pain, back        | 13 | 2 | 0 | 13 | 3 | <1 | 1.00 | 0.45 |

\*National Cancer Institute Common Terminology Criteria for Adverse Events version 3.0 adverse events reported for at least 10% of patients in either treatment arm. NOS = not otherwise specified.

**Table C2. Incidence of Serious Treatment-emergent Adverse Events**

| Serious adverse event *                                       | Incidence (%)       |                   |
|---------------------------------------------------------------|---------------------|-------------------|
|                                                               | Sorafenib (N = 297) | Placebo (N = 302) |
| <b>Overall incidence</b>                                      | 52                  | 54                |
| <b>Blood/bone marrow</b>                                      |                     |                   |
| Hemoglobin                                                    | 3                   | 2                 |
| <b>Cardiac general</b>                                        |                     |                   |
| Cardiac ischemia/infarction                                   | 3                   | 1                 |
| <b>Death</b>                                                  |                     |                   |
| Death not associated with CTCAE term, disease progression NOS | 19                  | 20                |
| <b>Constitutional symptoms</b>                                |                     |                   |
| Fatigue                                                       | 2                   | 3                 |
| Constitutional symptoms – other                               | 1                   | 2                 |
| <b>Gastrointestinal</b>                                       |                     |                   |
| Ascites                                                       | 5                   | 4                 |
| Diarrhea                                                      | 5                   | 2                 |
| Dehydration                                                   | 3                   | <1                |
| <b>Hemorrhage/bleeding</b>                                    |                     |                   |
| Gastrointestinal hemorrhage, esophageal varices               | 2                   | 4                 |
| Gastrointestinal hemorrhage, peritoneal cavity                | 0                   | 2                 |
| Upper gastrointestinal hemorrhage NOS                         | 1                   | 2                 |
| <b>Hepatobiliary</b>                                          |                     |                   |
| Liver dysfunction                                             | 7                   | 5                 |
| Hepatobiliary – other                                         | 4                   | 5                 |
| <b>Metabolic/laboratory</b>                                   |                     |                   |
| Bilirubin (hyperbilirubinemia)                                | 2                   | 1                 |
| <b>Pain</b>                                                   |                     |                   |
| Pain, abdomen NOS                                             | 2                   | 3                 |
| <b>Renal/genitourinary</b>                                    |                     |                   |

Renal failure

<1

3

\*Adverse events that resulted in death, were life threatening, required hospitalization or prolongation of existing hospitalization, resulted in a persistent or significant disability or incapacity, or a congenital anomaly or birth defect, required medical or surgical intervention to prevent any of these outcomes, or were determined by the investigator to be medically important event, reported for at least 2% of patients in either treatment arm. CTCAE = Common Terminology Criteria for Adverse Events; NOS = not otherwise specified.
